# Supplementary material
Source: PubMed Central journal article supplement (PMC10122913)
Supplement: NIHMS1694058-supplement-Appendix_1__2__3.pdf [file NIHMS1694058-supplement-Appendix_1__2__3.pdf]

## Appendix 1. Search Strategy

| Theme                             | MeSH/EMTREE terms                                            | Keywords                                                                                                                                                                                                                                                                                                      |
|-----------------------------------|--------------------------------------------------------------|---------------------------------------------------------------------------------------------------------------------------------------------------------------------------------------------------------------------------------------------------------------------------------------------------------------|
| Gestational Trophoblastic Disease | Gestational Trophoblastic Disease<br>( <i>NOT exploded</i> ) | <ul style="list-style-type: none"> <li>• Gestational Trophoblastic Disease</li> <li>• Gestational Trophoblastic Diseases</li> <li>• Gestational Trophoblastic Neoplasia</li> <li>• Gestational Trophoblastic Neoplasm</li> <li>• Gestational Trophoblastic Neoplasms</li> <li>• GTD</li> <li>• GTN</li> </ul> |
| Molar Pregnancy                   | Hydatidiform mole<br>( <i>Exploded</i> )                     | <ul style="list-style-type: none"> <li>• Molar</li> <li>• Mole</li> </ul>                                                                                                                                                                                                                                     |
| Human chorionic gonadotropin      | Chorionic Gonadotropin<br>( <i>Exploded</i> )                | <ul style="list-style-type: none"> <li>• Chorionic gonadotropin</li> <li>• Chorionic gonadotrophin</li> <li>• Choriogonadotropin</li> <li>• Choriogonadotrophin</li> <li>• hCG</li> <li>• BhCG</li> <li>• B-hCG</li> <li>• Beta-hCG</li> </ul>                                                                |

Albright BB, Shorter J, Mastroyannis SA, Ko EM, Schrieber CA, Sonalkar S. Gestational trophoblastic neoplasia after hCG normalization following molar pregnancy: a systematic review and meta-analysis. *Obstet Gynecol* 2020;135. The authors provided this information as a supplement to their article.  
©2019 American College of Obstetricians and Gynecologists.

## Appendix 2. Loss to follow-up and risk of bias for included studies.

|                                    | Follow-Up Assessment |                                  |                                       |                                     |                                          |                 | Risk of Bias Assessment |                              |                       |                              |                    |                    |                          |  |
|------------------------------------|----------------------|----------------------------------|---------------------------------------|-------------------------------------|------------------------------------------|-----------------|-------------------------|------------------------------|-----------------------|------------------------------|--------------------|--------------------|--------------------------|--|
|                                    | Total Patients (n)   | LTFU before first normal hCG (n) | Pregnancy before first normal hCG (n) | LTFU before 6 months normal hCG (n) | Pregnancy before 6 months normal hCG (n) | Same population | Exposure assessment     | Outcome not present at start | Confounder adjustment | Prognostic factor assessment | Outcome assessment | Adequate follow-up | Similar co-interventions |  |
| <b>Complete &amp; Partial Mole</b> |                      |                                  |                                       |                                     |                                          |                 |                         |                              |                       |                              |                    |                    |                          |  |
| Alazzam 2011                       | 3,926                | 0                                | 0                                     | NR                                  | NR                                       | +               | +                       | +                            | n/a                   | +                            | +                  | +                  | +                        |  |
| Batorfi 2004                       | 150                  | 6                                | 0                                     | 49                                  | 5                                        | +               | +                       | +                            | n/a                   | +                            | +                  | +                  | +                        |  |
| Braga 2015                         | 3,684                | 51                               | 0                                     | 601                                 | 11                                       | +               | +                       | +                            | n/a                   | +                            | +                  | +                  | +                        |  |
| Coyle 2017                         | 20,144               | 0                                | 0                                     | NR                                  | NR                                       | +               | +                       | +                            | n/a                   | +                            | +                  | +                  | +                        |  |
| Gueye 2014                         | 531                  | 0                                | 0                                     | NR                                  | NR                                       | +               | -                       | +                            | n/a                   | +                            | +                  | +                  | -                        |  |
| Nirmala 2013                       | 102                  | 0                                | 0                                     | 15                                  | 13                                       | +               | +                       | +                            | n/a                   | +                            | +                  | -                  | +                        |  |
| Riadh 2009                         | 90                   | 0                                | 0                                     | NR                                  | NR                                       | +               | +                       | +                            | n/a                   | +                            | +                  | +                  | +                        |  |
| Schmitt 2013                       | 2,008                | 24                               | 4                                     | NR                                  | NR                                       | +               | +                       | +                            | n/a                   | +                            | +                  | +                  | +                        |  |
| Usui 2018                          | 292                  | 0                                | 0                                     | 0                                   | 0                                        | +               | +                       | +                            | n/a                   | +                            | +                  | +                  | +                        |  |
| Wiesma 2006a/b                     | 758                  | 83                               | 0                                     | 326                                 | 54                                       | +               | +                       | +                            | n/a                   | +                            | +                  | -                  | +                        |  |
| Wolfberg 2004/6                    | 2,296                | 71                               | 0                                     | 1,273                               | NR                                       | +               | +                       | +                            | n/a                   | +                            | +                  | -                  | +                        |  |
| <b>Complete Mole Only</b>          |                      |                                  |                                       |                                     |                                          |                 |                         |                              |                       |                              |                    |                    |                          |  |
| Al-Talib 2016                      | 22                   | 0                                | 0                                     | 0                                   | 0                                        | n/a             | +                       | +                            | n/a                   | +                            | +                  | +                  | n/a                      |  |
| Fatima 2011                        | 85                   | 0                                | NR                                    | 5.7 mos.*                           | NR                                       | n/a             | +                       | +                            | n/a                   | +                            | +                  | +                  | n/a                      |  |
| Hoppenot 2016                      | 61                   | 3                                | 0                                     | 26 <sup>†</sup>                     | NR                                       | n/a             | +                       | +                            | n/a                   | +                            | +                  | ?                  | n/a                      |  |
| Horn 2006                          | 139                  | 0                                | 0                                     | 3.7 yrs <sup>†</sup>                | NR                                       | n/a             | +                       | +                            | n/a                   | +                            | +                  | +                  | n/a                      |  |
| Kerkmeijer 2007                    | 355                  | 0                                | 0                                     | 144                                 | NR                                       | n/a             | +                       | +                            | n/a                   | +                            | +                  | -                  | n/a                      |  |
| <b>Partial Mole Only</b>           |                      |                                  |                                       |                                     |                                          |                 |                         |                              |                       |                              |                    |                    |                          |  |
| Lavie 2005                         | 163                  | 83                               | 0                                     | 28                                  | 6                                        | n/a             | +                       | +                            | n/a                   | +                            | +                  | -                  | n/a                      |  |
| <b>Undifferentiated Mole</b>       |                      |                                  |                                       |                                     |                                          |                 |                         |                              |                       |                              |                    |                    |                          |  |
| Matsui 2001                        | 1,052                | 0                                | 0                                     | NR                                  | 102                                      | +               | -                       | +                            | n/a                   | -                            | -                  | +                  | +                        |  |
| Schlaerth 1981                     | 96                   | 19                               | NR                                    | NR                                  | NR                                       | +               | -                       | +                            | n/a                   | -                            | -                  | +                  | +                        |  |

LTFU = lost to follow-up; NR = not reported  
 \* = mean follow-up (n at 6 months not reported)  
 † = LTFU at 1 year, not reported at 6 months

|     |                         |
|-----|-------------------------|
| +   | Low risk of bias        |
| ?   | Unclear risk of bias    |
| -   | High risk of bias       |
| n/a | Category not applicable |

Albright BB, Shorter J, Mastroyannis SA, Ko EM, Schrieber CA, Sonalkar S. Gestational trophoblastic neoplasia after hCG normalization following molar pregnancy: a systematic review and meta-analysis. *Obstet Gynecol* 2020;135.

The authors provided this information as a supplement to their article.

©2019 American College of Obstetricians and Gynecologists.

**Appendix 3. Funnel plot for primary outcome.**

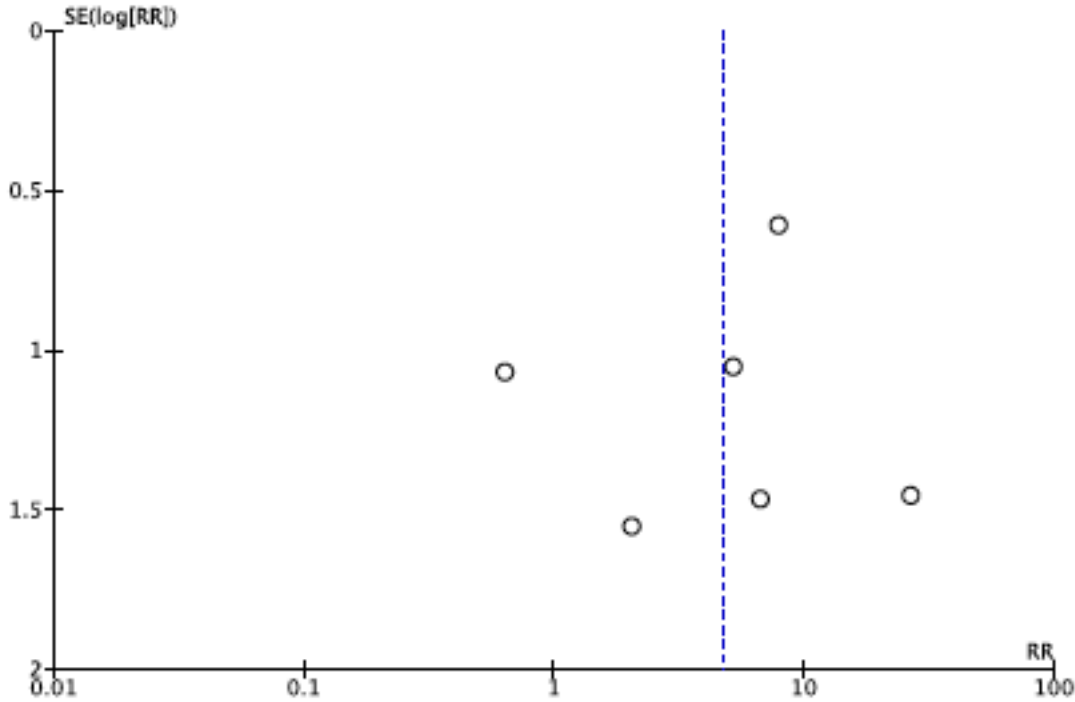

Albright BB, Shorter J, Mastroyannis SA, Ko EM, Schrieber CA, Sonalkar S. Gestational trophoblastic neoplasia after hCG normalization following molar pregnancy: a systematic review and meta-analysis. *Obstet Gynecol* 2020;135. The authors provided this information as a supplement to their article. ©2019 American College of Obstetricians and Gynecologists.
